# Supplementary material
Source: PubMed Central journal article supplement (PMC7393777)
Supplement: NIHMS1604931-supplement-Sup__1.pdf [file NIHMS1604931-supplement-Sup__1.pdf]

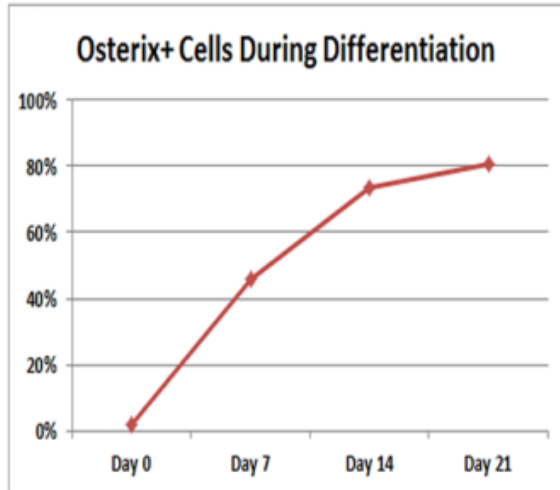

*Supplemental Figure 1: Osterix-mCherry positive cells increase during differentiation in vitro.*

In culture, initially ~2% of harvested bone is Osterix-mCherry+. As cells are differentiated toward the osteoblastic lineage, increasing percentages of cells become Osterix-mCherry positive, such that by 21 days in culture, 80% of the total cell population is fluorescent. n=3
